# Supplementary material
Source: PubMed Central journal article supplement (PMC6593883)
Supplement: fj.201802650RR.sf1.pdf [file fj.201802650RR.sf1.pdf]

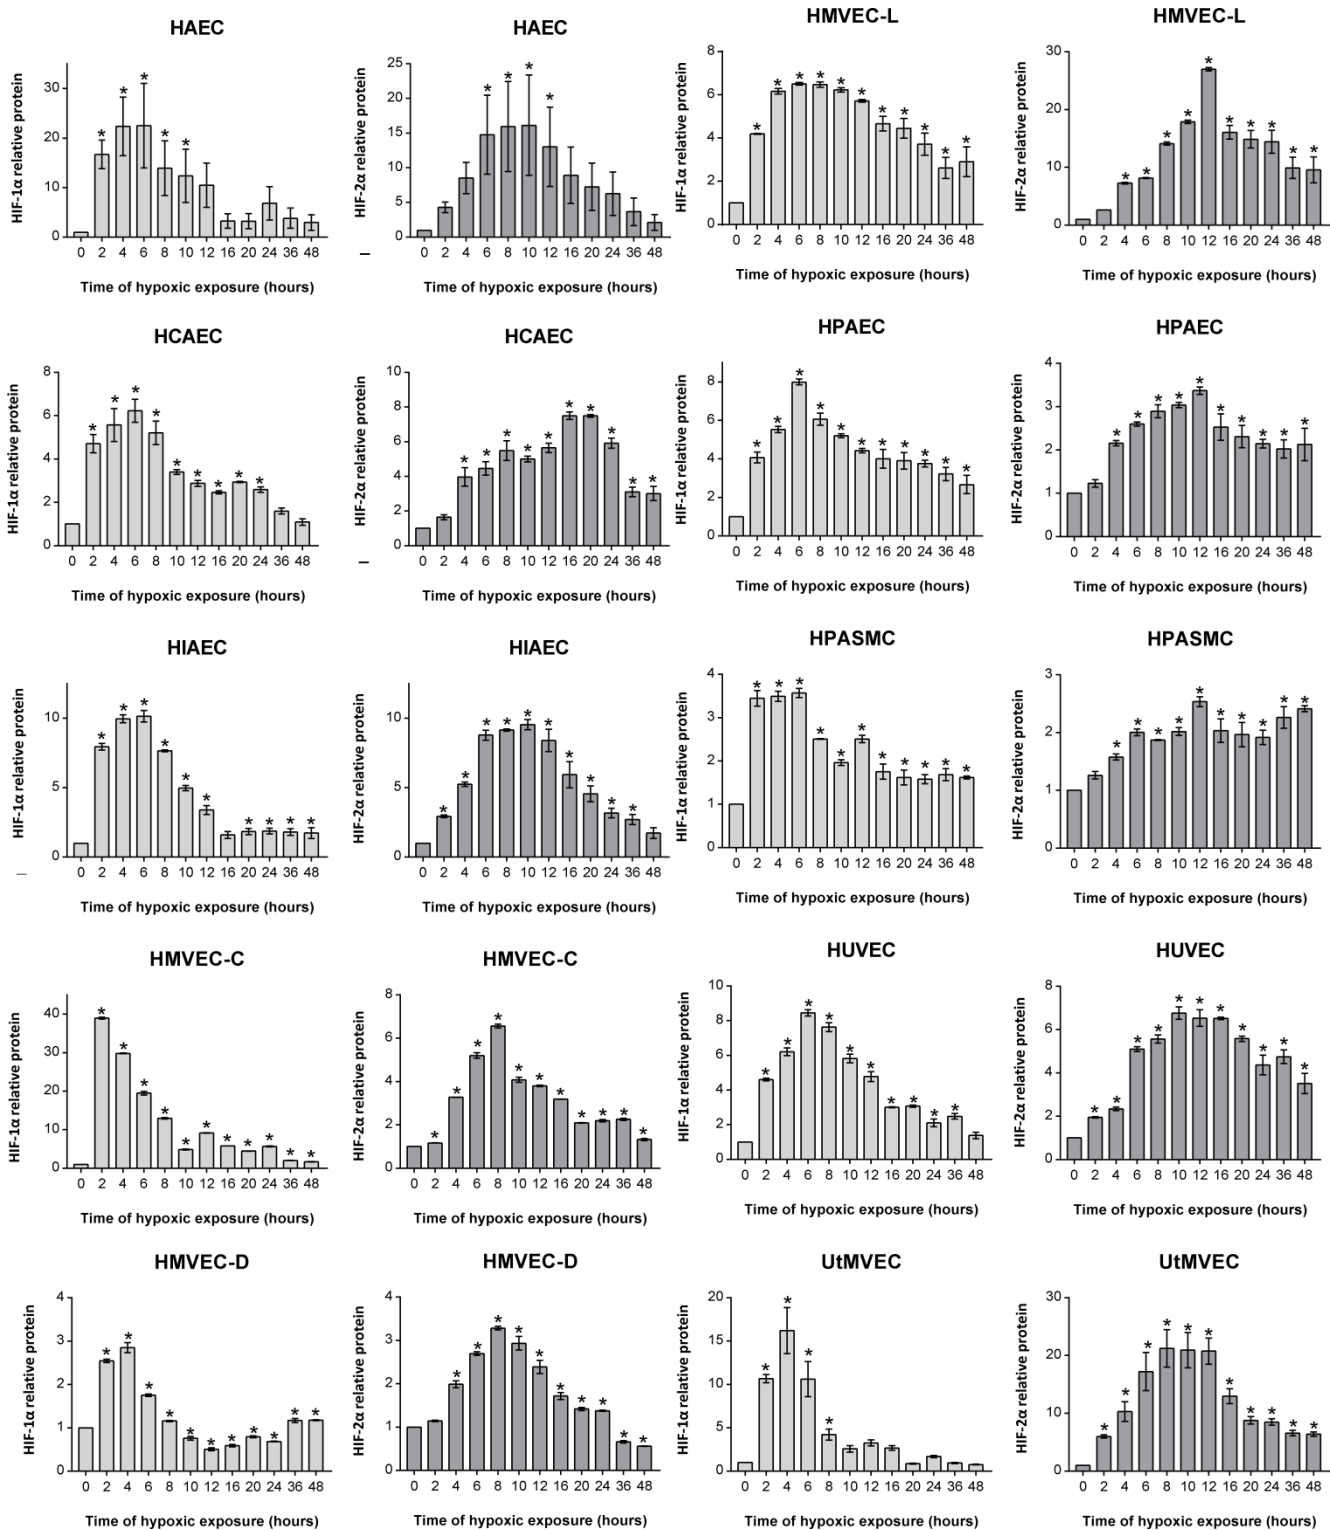

**Supplemental Figure 1.** Hypoxia results in accumulation of HIF-1α and HIF-2α in human ECs.

Densitometry analysis for Figure 1. Cells were exposed to hypoxia for the time periods specified and total RNA and protein lysates were collected. The changes in HIF-1α and HIF-2α protein levels were evaluated by western blot normalized to β-actin and total protein levels and related to normoxic control. Error bars represent standard error values. \* P < 0.05 was considered significant.
