# Supplementary material
Source: PubMed Central journal article supplement (PMC6593883)
Supplement: fj.201802650RR.sf3.pdf [file fj.201802650RR.sf3.pdf]

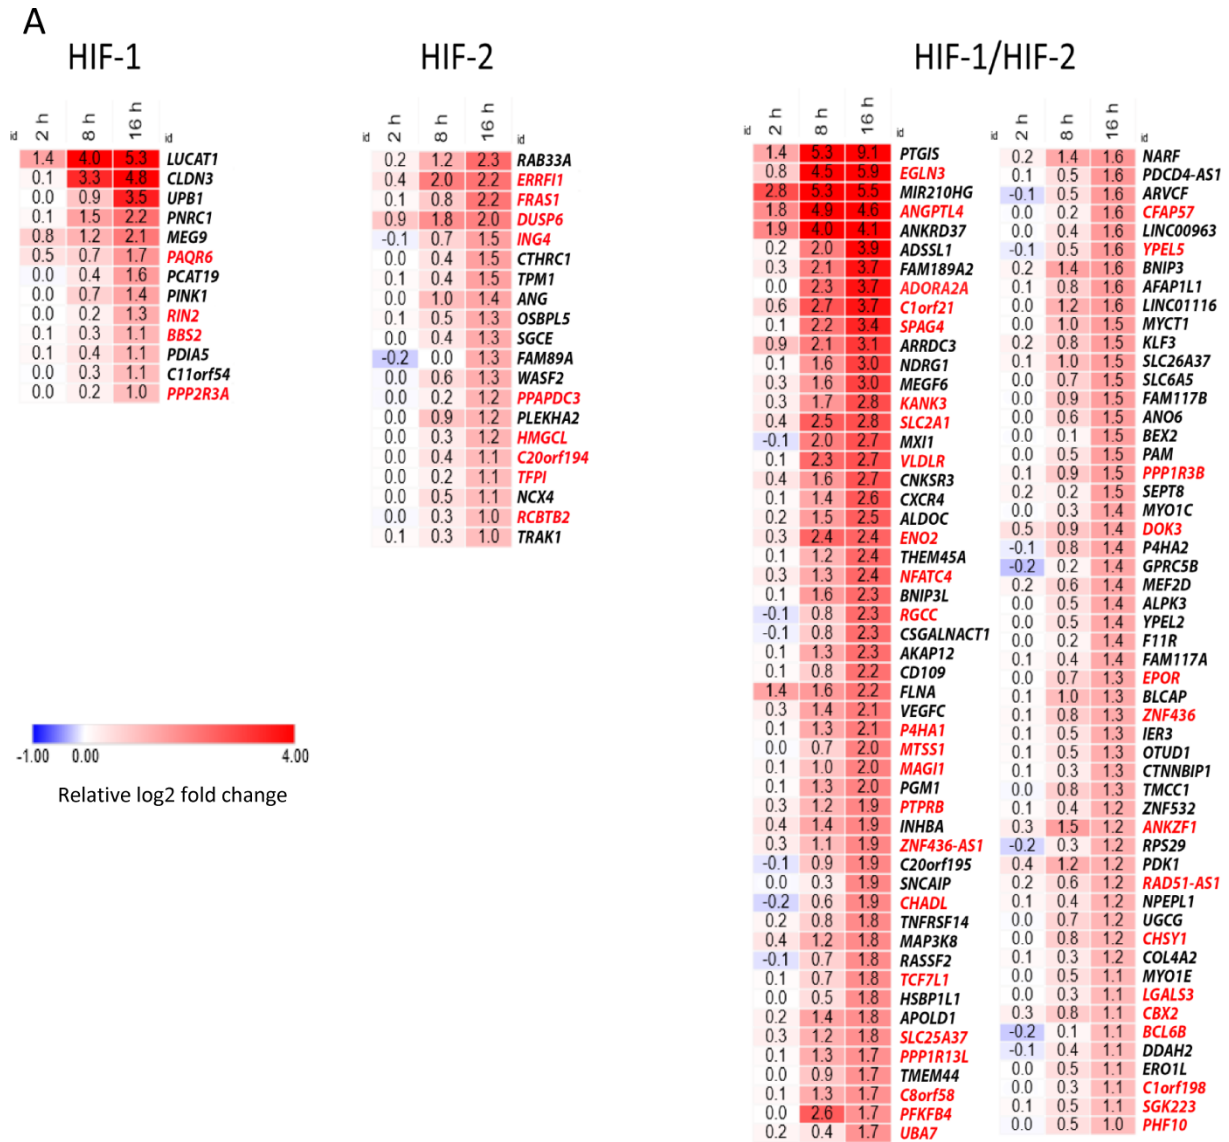

**Supplemental Figure 3.** Hypoxia induced changes in expression of HRE motifs containing genes significantly affected during hypoxia. Heat maps representing the significant ( $P < 0.005$ ) expression changes of unique HIF-1, HIF-2, and HIF-1/HIF-2 upregulated (A) and reduced (B) transcripts during 2h, 8h and 16h of hypoxia are provided in (A). The HRE motifs containing genes in agreement with Smythies JA et al. 2019(43) are depicted with red (for upregulated set A) and blue (for downregulated set B) and combined in **Supplemental Table 1C**. Heat maps were generated with Morpheus software (Morpheus, <https://software.broadinstitute.org/morpheus>).

B

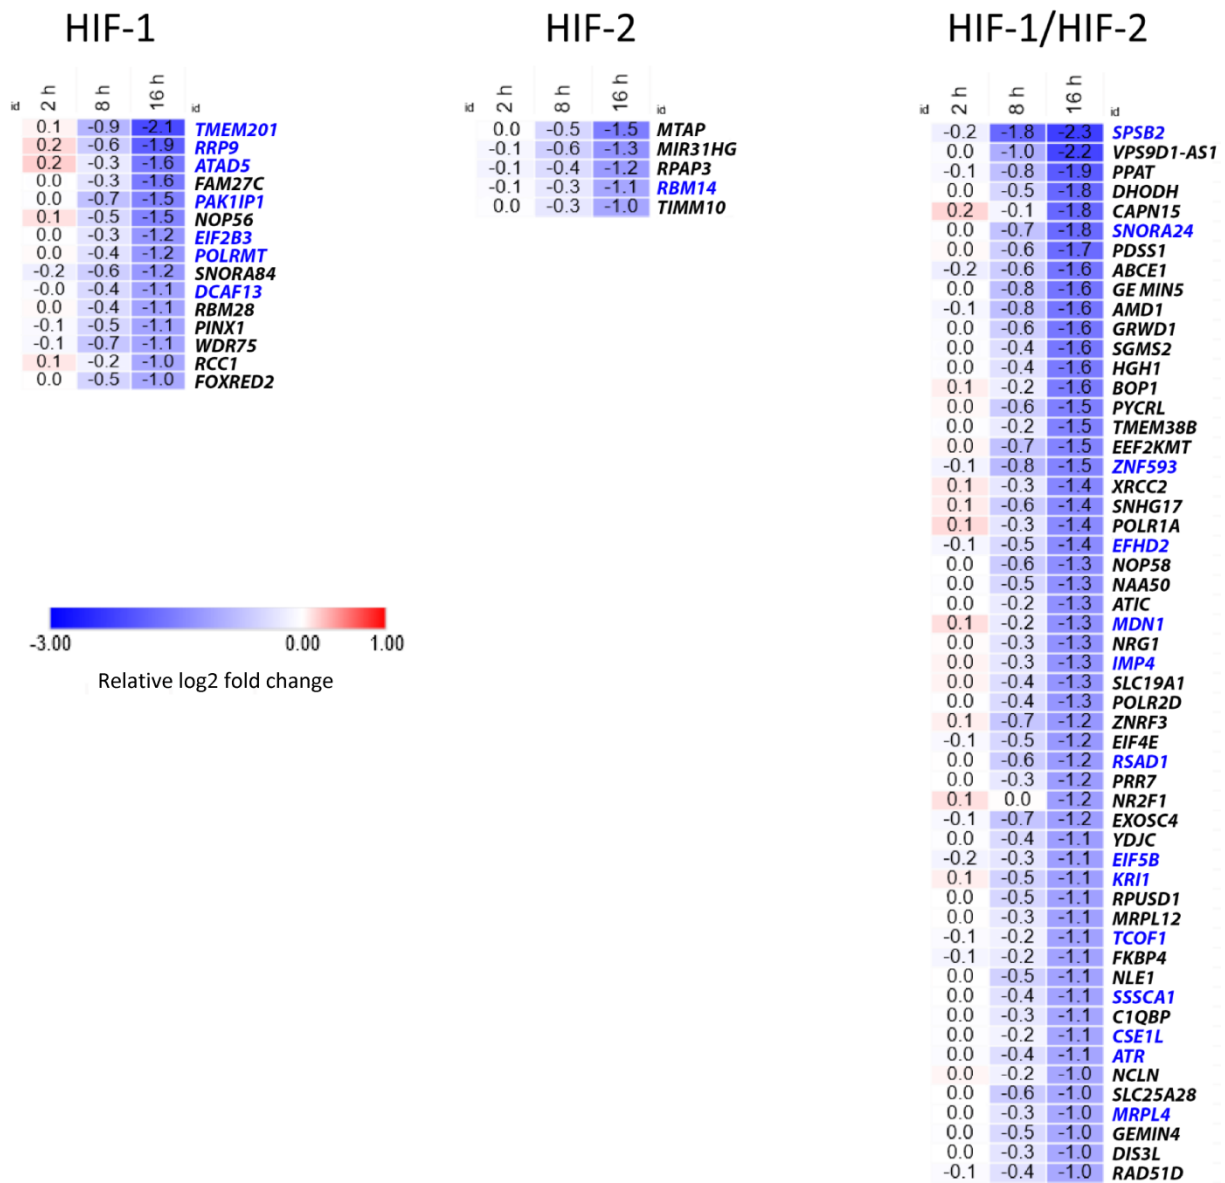

**Supplemental Figure 3.** Hypoxia induced changes in expression of HRE motifs containing genes significantly affected during hypoxia. Heat maps representing the significant (p-value below  $P < 0.005$ ) expression changes of unique HIF-1, HIF-2, and HIF-1/HIF-2 upregulated (A) and reduced (B) transcripts during 2h, 8h and 16h of hypoxia are provided in (A). The HRE motifs containing genes in agreement with Smythies JA et al. 2019(43) are depicted with red (for upregulated set A) and blue (for downregulated set B) and combined in **Supplemental Table 1C**. Heat maps were generated with Morpheus software (Morpheus, <https://software.broadinstitute.org/morpheus>).
